# Supplementary material for: Aortic Vascular Graft and Endograft Infection–Patient Outcome Cannot Be Determined Based on Pre-Operative Characteristics
Source: MDPI journal article supplement (doi:10.3390/jcm13010269), 2024-01-03
Supplement: s1 [file s1]

**Table S1. Microbiology data for individual patients.** The initial graft and the time to infection is shown. One patient (52) had a vena cava fistula. *neg* = blood culture/intraOP swab negative; empty cell = non taken/retrieved; *cons* = conservative treatment; Bacteria: a = *E. faecium*; b = *K. pneumoniae*; c = *E. coli*; d = *C. albicans*; e = *Strept. sanguinis*; f = *Staph. epidermidis*; g = *NEST*; h = *MRSA*; i = *Strept. dysgalactiae*; j = *S. marcescens*; k = *Salmonella enterica*; m = *Staph. capitis*; n = *VRE Vancomycin resistant Enterococcus*; o = *Corynebact. spec.*; p = *Staph. aureus*; q = *Prot. vulgaris*; r = *Bact. species*; s = *E. faecalis*; t = *C. glabrata*; u = *Staph. haemolyticus*; v = *Clostridium spec.*; w = 3MRGN; y = *Citrobacter freundii*; z = *Strept. anginosus*; \$ = *Strept. mitis*; & = *Cutibacterium acnes*; § = *P. aeruginosa*; ß = *Propionibact. acnes*; α = *Enterococcus avium*; δ = *Lactobacillus plantarum*; ε = *Candida parapsilosis*; ζ = *Listeria monocytogenes*; η = *Staph. warneri*; θ = *Finegoldia magna*; λ = *Streptococcus oralis*; μ = *Enterobacter cloacae*; ξ = *Veiilonella parvula*; π = *Staph. hominis*; σ = *Streptococcus agalactiae*; φ = *Proteus mirabilis*; ψ = *Streptococcus intermedius*; ω = *Streptococcus constellatus*; β = *Egerthella lenta*; ϑ = *Solobacterium Moorei*; ϕ = *Lactobacillus rhamnosus*; ω = *Klebs. aerogenes*; Ç = *Eikinella spp*; X = *Atopium parvalum*; ə = *Actinomyces odontolyticus*; SUV = standard uptake value; VGS = visual grading scale; outcome: x = respectice endpoint (EP) reached.

| #  | graft |       |    | time to VGEL (mo) | fistula   |           |          |        | microbiology  |            |        |            |      |            | PET       |                          |                          |                          | out come  |           |             |
|----|-------|-------|----|-------------------|-----------|-----------|----------|--------|---------------|------------|--------|------------|------|------------|-----------|--------------------------|--------------------------|--------------------------|-----------|-----------|-------------|
|    | EVAR  | TEVAR | OR |                   | cutaneous | esophagus | duodenum | ureter | blood culture | Δ time (d) | biopsy | Δ time (d) | swab | Δ time (d) | swab @ OP | SUV <sub>max</sub> aorta | SUV <sub>max</sub> liver | SUV <sub>max</sub> blood | VGS (0-4) | safety EP | efficacy EP |
| 1  | X     |       |    | 48                | X         |           |          |        | neg           | 1          |        |            |      |            | k         | 16.4                     | 2.6                      | 2.1                      | 4         | X         | X           |
| 2  |       |       | X  | 155               |           |           |          |        |               |            | a      | 189        | m    | 4          | b,n       | 4.7                      | 3.3                      | 1.8                      | 4         | X         | -           |
| 3  |       |       | X  | 2                 |           |           |          |        | d             | 17         |        |            |      |            |           |                          |                          |                          |           | X         | -           |
| 4  |       | X     |    | 30                |           | X         |          |        | neg           | 64         |        |            |      |            | d,o       | 22.2                     | 6                        | 4                        | 4         | -         | -           |
| 5  |       |       | X  | 1                 |           |           |          |        |               |            |        |            |      |            | c         |                          |                          |                          |           | X         | -           |
| 6  |       |       | X  | 76                | X         |           |          |        |               |            |        |            | f    | 64         | f         |                          |                          |                          |           | X         | X           |
| 7  |       |       | X  | 62                | X         |           |          |        | neg           | 1          |        |            |      |            | d         | 24.3                     | 3.5                      | 3                        | 3         | X         | X           |
| 8  |       |       | X  | 92                |           |           |          |        | p             | 1          |        |            |      |            | p         |                          |                          |                          |           | X         | X           |
| 9  | X     |       |    | 7                 |           |           |          |        | c             | 2          |        |            |      |            | c         |                          |                          |                          |           | X         | -           |
| 10 |       |       | X  | 1                 |           |           |          |        |               |            |        |            |      |            | c,q,r,s   |                          |                          |                          |           | X         | -           |
| 11 |       |       | X  | 1                 |           |           |          |        | neg           | 17         |        |            | p,s  | 10         | b         |                          |                          |                          |           | X         | X           |
| 12 |       |       | X  | 78                |           |           | X        |        | neg           | 27         |        |            | b,c  | 5          | a,b,c,d,t | 4.6                      | 2.6                      | 2.1                      | 3         | X         | -           |
| 13 |       |       | X  | 24                | X         |           |          |        |               |            |        |            |      |            | c,d       | 8.7                      | 2.7                      | 2.6                      | 4         | X         | -           |
| 14 |       |       | X  | 40                |           |           |          |        |               |            |        |            |      |            | a,u       |                          |                          |                          |           | -         | -           |
| 15 | X     |       |    | 32                |           |           | X        |        |               |            |        |            |      |            | f         | 8.2                      | 3.2                      | 3.4                      | 4         | X         | -           |
| 16 |       |       | X  | 1                 |           |           |          |        | neg           | 4          |        |            |      |            | f         |                          |                          |                          |           | -         | -           |
| 17 | X     |       |    | 25                |           |           | X        |        |               |            |        |            |      |            | v         |                          |                          |                          |           | -         | -           |

|    |   |   |     |     |   |   |     |    |           |    |     |    |               |      |     |     |   |   |   |
|----|---|---|-----|-----|---|---|-----|----|-----------|----|-----|----|---------------|------|-----|-----|---|---|---|
| 18 |   | X | 1   |     |   |   | neg | 17 |           |    |     |    | c             |      |     |     |   | - | - |
| 19 |   | X | 121 |     |   | X | neg | 9  |           |    |     |    | b,w           | 12.2 | 3.5 | 3.1 | 4 | X | X |
| 20 |   | X | 4   |     |   |   | f   | 99 |           |    |     |    | s,u           | 18.3 | 4.5 | 4   | 4 | X | - |
| 21 | X |   | 35  |     |   |   | neg | 2  |           |    |     |    | w,y           | 8.9  | 3.4 | 3   | 4 | X | - |
| 22 |   | X | 123 |     |   |   | neg | 0  |           |    |     |    | z             |      |     |     |   | X | X |
| 23 | X |   | 29  |     |   |   | i   | 10 |           |    |     |    | u             |      |     |     |   | X | X |
| 24 | X |   | 102 |     |   |   | neg | 1  |           |    |     |    | neg           | 22.2 | 6   | 4   | 4 | - | - |
| 25 |   | X | 37  |     |   | X |     |    |           |    |     |    | y             |      |     |     |   | X | X |
| 26 |   | X | 1   | X   |   |   | neg | 18 | h         | 16 |     |    | neg           |      |     |     |   | X | X |
| 27 |   | X | 156 | X   |   |   | neg | 9  |           |    |     |    | f             | 11.3 | 3.6 | 2.8 | 4 | X | X |
| 28 |   | X | 160 |     |   |   | neg | 4  |           |    |     |    | d             |      |     |     |   | X | X |
| 29 |   | X | 24  |     | X |   | neg | 1  |           |    |     |    | z,\$          |      |     |     |   | - | - |
| 30 | X |   | 2   |     |   |   | neg | 5  |           |    |     |    | neg           | 13.4 | 3.8 | 4.2 | 4 | - | - |
| 31 | X |   | 4   |     |   |   |     |    |           |    |     |    | j             | 16.3 | 2.4 | 1.6 | 4 | - | - |
| 32 |   | X | 5   |     |   |   |     |    |           |    |     |    | neg           |      |     |     |   | - | - |
| 33 | X |   | 3   |     |   | X | k   | 1  |           |    |     |    | k             | 18.5 | 3.2 | 3.1 | 4 | X | X |
| 34 | X |   | 24  |     |   |   | neg | 11 |           |    |     |    | c             | 25.9 | 4.7 | 3.6 | 6 | X | X |
| 35 | X |   | 16  |     |   | X | neg | 2  |           |    |     |    | \$            |      |     |     |   | X | - |
| 36 | X |   | 8   |     |   |   | neg | 9  |           |    |     |    | d             | 13.4 | 3.3 | 2.6 | 4 | - | - |
| 37 | X |   | 1   |     |   |   | neg | 1  |           |    |     |    | neg           | 22.2 | 5.4 | 4.1 | 4 | - | - |
| 38 | X |   | 14  |     |   |   | neg | 22 | p         | 12 |     |    | neg           |      |     |     |   | X | X |
| 39 |   | X | 1   |     |   |   | u   | 3  |           |    |     |    | c             |      |     |     |   | X | - |
| 40 |   | X | 65  |     |   |   | neg | 1  | neg       | 12 |     |    | &             | 6.4  | 5.4 | -   | 4 | X | - |
| 41 | X |   | 1   |     |   |   |     |    |           |    |     |    | d             | 13.1 | 2.4 | 2   | 4 | X | - |
| 42 | X |   | 11  |     |   |   | §   | 13 | §         | 7  |     |    | §             | 19.1 | 3.5 | 2.3 | 4 | X | X |
| 43 | X |   | 6   |     |   |   | f   | 3  |           |    |     |    | f             | 6.7  | 2.9 | 2.9 | 4 | X | X |
| 44 |   | X | X   | 132 |   |   |     |    |           |    |     |    | ß             | 15   | 4   | 2.8 | 4 | X | X |
| 45 |   | X | 0   |     |   |   | neg | 16 | o         | 15 | p   | 15 | o             |      |     |     |   | X | - |
| 46 |   | X | 36  |     |   | X |     |    |           |    |     |    | f             | 8.4  | 2.4 | 2.5 | 4 | X | - |
| 47 |   | X | 3   |     |   |   | neg | 6  | neg       | 7  |     |    | neg           |      |     |     |   | X | X |
| 48 |   | X | 133 |     |   | X | neg | 2  |           |    |     |    | neg           |      |     |     |   | X | - |
| 49 |   | X | 209 |     |   | X | neg | 2  |           |    |     |    | d,α,δ         | 10.6 | 4.2 | 2.9 | 4 | X | - |
| 50 |   | X | 40  |     |   |   |     |    |           |    |     |    | a             |      |     |     |   | X | - |
| 51 |   | X | 79  |     |   | X | f   | 14 |           |    |     |    | neg           | 9.9  | 3.5 | 3.2 | 3 | X | - |
| 52 | X |   | 0   |     |   |   | neg | 7  |           |    |     |    | s             | 5.5  | 3.5 | 1.9 | 4 | X | - |
| 53 | X |   | 1   |     |   |   | neg | 6  |           |    | h,ε | 21 | h,§           | 4.5  | 3.2 | 2.7 | 3 | - | - |
| 54 | X |   | 0   |     |   |   | neg | 15 |           |    |     |    | neg           | 12.8 | 2.8 | 1.6 | 4 | X | - |
| 55 |   | X | 14  |     |   |   |     |    |           |    |     |    | f             |      |     |     |   | X | - |
| 56 |   | X | 15  |     |   |   | ζ   | 14 | ζ         | 17 |     |    |               | 4    | 2.7 | 2.5 | 4 | X | - |
| 57 |   | X | 52  | X   |   |   | u,η | 26 | u,&,η,θ   | 12 |     |    | neg           | 3.4  | 3.3 | 2.2 | 3 | X | X |
| 58 |   | X | 28  |     | X |   | neg | 20 | ξ,μ,λ     | 19 |     |    | a,π,μ,d       | 5.1  | 2.3 | 1.4 | 4 | X | - |
| 59 |   | X | 3   |     |   |   | a,s | 36 |           |    | s,§ | 6  | s,§           | 8.9  | 3.4 | 2.2 | 4 | X | X |
| 60 | X |   | 95  |     |   |   | neg | 14 | p         | 26 |     |    |               | 5.9  | 4.4 | 2.1 | 4 | X | X |
| 61 | X |   | 42  |     |   |   | neg | 0  |           |    |     |    | σ             |      |     |     |   | X | X |
| 62 | X |   | 29  |     |   |   | c   | 7  | c,s,d,§,φ | 12 |     |    | a,c,s,d,§,φ,r |      |     |     |   | X | - |
| 63 |   | X | 107 |     |   | X | neg | 3  |           |    |     |    | c,s,ψ,ω       |      |     |     |   | X | - |
| 64 |   | X | 0   |     |   |   | neg | 12 |           |    | a,d | 9  | a,d,β         |      |     |     |   | X | - |
| 65 | X |   | 58  |     |   |   | neg | 8  |           |    |     |    | b,p,q,s,z,θ   |      |     |     |   | X | - |
| 66 |   | X | 26  |     |   | X | neg | 13 | c,φ       | 14 |     |    | c,d,φ         | 7.7  | 2.8 | 1.6 | 4 | X | X |
| 67 |   | X | 25  |     |   |   | z   | 9  | c,r,z     | 9  |     |    | neg           |      |     |     |   | X | - |
| 68 |   | X | 20  | X   |   | X |     |    | c         | 2  |     |    | neg           | 6.8  | 2.6 | 2.2 | 4 | X | - |
| 69 |   | X | 14  |     |   |   | neg | 13 |           |    | a,ω | 10 | a             |      |     |     |   | - | - |
| 70 |   | X | 6   |     |   | X | neg | 0  |           |    |     |    | Ç             |      |     |     |   | X | - |
| 71 |   | X | 34  |     |   |   | neg | 10 |           |    |     |    | s             | 13.8 | 3.6 | 3.2 | 4 | - | - |
| 72 |   | X | 6   |     | X |   | neg | 6  | z,\$,ω    | 5  |     |    | z,\$,ω,Ǻ      |      |     |     |   | X | X |
| 73 |   | X | 0   |     |   |   | f   | 38 | f         | 33 |     |    | μ             | 4.4  | 3.4 | 2.9 | 4 | X | - |

|    |   |   |   |     |   |   |   |  |     |   |     |   |  |  |       |      |     |     |   |   |   |
|----|---|---|---|-----|---|---|---|--|-----|---|-----|---|--|--|-------|------|-----|-----|---|---|---|
| 74 |   |   | X | 11  |   |   | X |  | neg | 2 |     |   |  |  | z,φ,ə |      |     |     |   | X | X |
| 75 | X |   |   | 3   |   |   |   |  | neg | 7 | c   | 7 |  |  | c     | 17.5 | 3.1 | 2.7 | 4 | X | X |
| 76 |   |   | X | 2   |   |   |   |  |     |   |     |   |  |  | f     | 17.9 | 3.4 | 2.9 | 4 | X | X |
|    |   |   |   |     |   |   |   |  |     |   |     |   |  |  |       |      |     |     |   |   |   |
| 77 | X |   |   | 66  | X |   |   |  |     |   | a   |   |  |  | cons  | 16.3 | 2.7 | 2.2 | 4 | X |   |
| 78 | X |   |   | 40  |   |   |   |  |     |   | b   |   |  |  | cons  | 9.8  | 3.3 | 2.2 | 4 | X |   |
| 79 |   | X |   | 1   |   | X |   |  |     |   | c,d |   |  |  | cons  | 10   | 4.6 | 3.1 | 4 | X |   |
| 80 |   | X |   | 77  |   |   |   |  |     |   | e   |   |  |  | cons  | 44   | 3.6 | 2.1 | 4 | X |   |
| 81 |   | X |   | 10  |   | X |   |  |     |   | a,f |   |  |  | cons  |      |     |     |   | - |   |
| 82 |   | X |   | 1   |   | X |   |  | neg |   |     |   |  |  | cons  |      |     |     |   | X |   |
| 83 |   |   | X | 2   |   |   |   |  |     |   | d   |   |  |  | cons  |      |     |     |   | - |   |
| 84 | X |   |   | 65  |   | X |   |  |     |   | g   |   |  |  | cons  |      |     |     |   | - |   |
| 85 |   |   | X | 2   |   |   |   |  |     |   | b   |   |  |  | cons  | 6.9  | 3.2 | 2.8 | 4 | X |   |
| 86 |   |   | X | 147 |   |   |   |  |     |   |     |   |  |  | cons  | 11.6 | 3.1 | 2.9 | 4 | X |   |
| 87 |   |   | X | 1   |   |   |   |  |     |   | f   |   |  |  | cons  | 20.5 | 3.6 | 3.3 | 4 | X |   |
| 88 |   |   | X | 60  |   |   |   |  |     |   |     |   |  |  | cons  | 7.9  | 4.9 | 3.3 | 3 | X |   |
| 89 |   |   | X | 180 |   |   |   |  |     |   | h   | h |  |  | cons  | 8.8  | 3.1 | 2.3 | 4 | X |   |
| 90 |   |   | X | 53  |   |   |   |  |     |   | c   |   |  |  | cons  | 7.5  | 4.1 | 3.5 | 4 | X |   |
| 91 | X | X |   | 12  |   |   |   |  |     |   | f   |   |  |  | cons  | 18   | 2.5 | 1.9 | 4 | X |   |
| 92 |   |   | X | 60  |   |   |   |  |     |   | d,j |   |  |  | cons  | 15   | 5.3 | 3.8 | 4 | X |   |
| 93 |   |   | X | 1   |   |   |   |  | neg |   |     |   |  |  | cons  | 7.9  | 4.3 | 3.4 | 4 | X |   |

**Table S2. MAGIC criteria.** Given is the absolute number (percentage) of patients with positive major and/or minor criteria in three categories. Chi-Square test to compare operative vs. conservative in the respective category,  $p < 0.05$  is considered significant and highlighted bold.

|                        | Lyons criteria    |           |            |           |            |           |
|------------------------|-------------------|-----------|------------|-----------|------------|-----------|
|                        | surgical/clinical |           | radiologic |           | laboratory |           |
|                        | major             | minor     | major      | minor     | major      | minor     |
| <b>combined (N=93)</b> | 56 (60.2)         | 53 (57.0) | 77 (82.8)  | 37 (39.8) | 83 (89.2)  | 66 (71.0) |
| operative (N=76)       | 46 (60.5)         | 43 (56.6) | 29 (38.2)  | 62 (81.6) | 58 (76.3)  | 68 (89.5) |
| conservative(N=17)     | 8 (47.1)          | 12 (70.6) | 8 (47.1)   | 15 (88.2) | 8 (47.1)   | 15 (88.2) |
| p                      | 0.16              |           | 0.68       |           | 0.06       |           |

**Table S3. Comparison PET/CT VGEI and control cohort characteristics.** Age = age at initial operation; patient characteristics missing in four control group patients; Chi-Square test to compare VGEI+PET cohort vs. control group and VGEI+PET cohort vs. entire VGEI cohort, respectively;  $p < 0.05$  is considered significant and highlighted bold.

|                                     | VGEI+PET<br>N=53                | control group<br>N=19     | P      | P<br>vs.<br>combined<br>(Table I) |
|-------------------------------------|---------------------------------|---------------------------|--------|-----------------------------------|
| patient characteristics             |                                 |                           |        |                                   |
| age (years; mean ± SD)              | 64.8 ± 10.7                     | 68.5 ± 8.9                | 0.48   | 0.8                               |
| sex (male: N; %)                    | 40 (75.5)                       | 17 (89.4)                 | 0.19   | 0.98                              |
| hyperlipidemia                      | 39 (73.6)                       | 12 (70.6)                 | 0.39   | 0.91                              |
| diabetes                            | 15 (28.3)                       | 4 (23.5)                  | 0.54   | 0.82                              |
| nicotine abuse (active)             | 16 (30.2)                       | 1 (5.3)                   | 0.06   | 0.66                              |
| alcohol abuse (active)              | 6 (11.3)                        | 0                         | 0.19   | 0.46                              |
| COPD                                | 13 (24.5)                       | 4 (23.5)                  | 0.76   | 0.81                              |
| renal insufficiency                 | 19 (35.8)                       | 7 (41.2)                  | 0.94   | 0.06                              |
| dialysis                            | 3 (5.7)                         | 0                         | 0.56   | 0.72                              |
| cancer (history/present in control) | 10 (18.9)                       | 19 (100)                  | <0.001 | 0.45                              |
| arterial hypertension               | 49 (92.5)                       | 14 (82.4)                 | 0.04   | 0.7                               |
| PAOD                                | 23 (43.4)                       | 0                         | <0.001 | 0.53                              |
| CAD                                 | 28 (52.8)                       | 8 (47.1)                  | 0.59   | 0.54                              |
| initial operation                   |                                 |                           |        |                                   |
| EVAR                                | 20 (37.7)<br>(1xcomplex;2xmono) | 15 (78.9)<br>(1x complex) | 0.02   | 0.32                              |
| TEVAR                               | 7 (13.2)                        | 2 (10.5)                  |        |                                   |
| OAR                                 | 26 (49.1)                       | 2 (10.5)                  |        |                                   |
| rupture                             | 9 (17.0)                        | 2 (10.5)                  | 0.72   | 0.79                              |
| ex domo                             | 28 (54.7)                       | 9 (47.4)                  | 0.68   | 0.68                              |
| VGEI characteristics                |                                 |                           |        |                                   |
| time-to-infection (months)          |                                 |                           |        | 0.2                               |
| early infection                     |                                 |                           |        | 0.73                              |
| late infection                      |                                 |                           |        |                                   |
| fistula                             | cutaneous                       |                           |        | 0.46                              |
|                                     | gastro-intestinal               |                           |        | 0.45                              |
|                                     | ureter                          |                           |        | 0.73                              |
| B-symptoms                          |                                 |                           |        | 0.27                              |
| Lab                                 | leucocytes (cells/μL)           |                           |        | 0.07                              |
|                                     | CRP (mg/dL)                     |                           |        | 0.53                              |
|                                     | PCT(ng/ml)                      |                           |        | 0.33                              |
| treatment strategy                  |                                 |                           |        |                                   |
| operative (vs. conservative)        |                                 | 40 (75.5)                 |        |                                   |

**Table S4. Complication rates operative cohort after Clavien-Dindo.**

|                                     |           | <b>combined<br/>N = 76</b> |
|-------------------------------------|-----------|----------------------------|
| <b>postoperative course</b>         |           |                            |
| complication rates<br>Clavien-Dindo | type I    | 5 (6.6)                    |
|                                     | type II   | 21 (27.6)                  |
|                                     | type IIIa | 6 (7.9)                    |
|                                     | type IIIb | 16 (21.1)                  |
|                                     | type Iva  | 9 (11.8)                   |
|                                     | type IVb  | 1 (1.3)                    |
|                                     | type V    | 15 (19.7)                  |

**Table S5. Univariate analysis of in-hospital mortality.** Logistic regression analysis; p<0.05 is considered significant and highlighted bold.

| in-hospital mortality            |                   | Odds ratio  | 95%-confidence interval | p            |
|----------------------------------|-------------------|-------------|-------------------------|--------------|
| <b>patient characteristics</b>   |                   |             |                         |              |
| sex (male vs. female)            |                   | 0.84        | 0.25 – 2.87             | 0.78         |
| age (+1year)                     |                   | <b>1.06</b> | <b>1.01 – 1.12</b>      | <b>0.04</b>  |
| +1 co-morbidity                  |                   | 1.19        | 0.87 – 1.63             | 0.27         |
| diabetes                         |                   | 1.63        | 0.56 – 4.78             | 0.37         |
| nicotine abuse (active)          |                   | 0.36        | 0.09 – 1.34             | 0.13         |
| COPD                             |                   | 1.58        | 0.52 – 4.82             | 0.42         |
| renal insufficiency              |                   | 1.38        | 0.45 – 4.15             | 0.57         |
| dialysis                         |                   | 4.8         | 0.88 – 26.12            | 0.07         |
| cancer (history)                 |                   | 1.42        | 0.44 – 4.57             | 0.56         |
| PAOD                             |                   | 1.21        | 0.43 – 3.38             | 0.72         |
| CAD                              |                   | 1.8         | 0.63 – 5.14             | 0.28         |
| <b>initial operation</b>         |                   |             |                         |              |
| aortic aneurysm                  |                   | <b>4.76</b> | <b>1.02 – 22.3</b>      | <b>0.047</b> |
| occlusive disease                |                   | 0.28        | 0.06 – 1.33             | 0.11         |
| aortic dissection                |                   | -           | -                       | -            |
| EVAR                             |                   | 1.93        | 0.67 – 5.53             | 0.22         |
| TEVAR                            |                   | 1.3         | 0.32 – 5.31             | 0.72         |
| OAR                              |                   | 0.42        | 0.15 – 1.22             | 0.11         |
| rupture                          |                   | 2           | 0.61 – 6.72             | 0.25         |
| <b>VGEI characteristics</b>      |                   |             |                         |              |
| early infection                  |                   | 0.78        | 0.45 – 1.38             | 0.41         |
| late infection                   |                   | 1.53        | 0.47 – 4.97             | 0.48         |
| fistula                          |                   | 0.65        | 0.21 – 2                | 0.45         |
| B-symptoms                       |                   | <b>4.22</b> | <b>1.27 – 14</b>        | <b>0.02</b>  |
| <b>PET quantitative analysis</b> |                   |             |                         |              |
| SUV <sub>max</sub> aorta (+4)    |                   | 1.29        | 0.89 – 1.87             | 0.17         |
| SUV <sub>TLR</sub> (+1)          |                   | 1.08        | 0.77 – 1.52             | 0.66         |
| SUV <sub>TBR</sub> (+1)          |                   | 1.04        | 0.84 – 1.29             | 0.72         |
| <b>operative setting</b>         |                   |             |                         |              |
| emergency operation              |                   | 1.01        | 0.26 – 4                | 0.99         |
| extent                           | thoracic          | 0.33        | 0.03 – 4.19             | 0.31         |
|                                  | thorac-abdominal  | 0.21        | 0.03 – 1.64             | 0.14         |
|                                  | abdominal         | 1.54        | 0.35 – 6.8              | 0.56         |
| <b>procedural details</b>        |                   |             |                         |              |
| operating time (+30min)          |                   | 0.96        | 0.86 – 1.07             | 0.48         |
| reco                             | tube              | <b>5.2</b>  | <b>1.56 – 17.36</b>     | <b>0.007</b> |
|                                  | bifurcation       | <b>0.28</b> | <b>0.09 – 0.93</b>      | <b>0.04</b>  |
| material                         | pericardium       | 3.17        | 0.81 – 12.41            | 0.1          |
|                                  | silver coated Dac | -           | -                       | -            |
|                                  | deep vein         | 1.28        | 0.31 – 5.35             | 0.74         |
| renal cold perfusion             |                   | 4.54        | 0.58 – 35.25            | 0.15         |
| ECMO                             |                   | 2.1         | 0.55 – 8.07             | 0.28         |
| omentum plasty                   |                   | 2.8         | 0.59 – 13.34            | 0.19         |
| gastro-intestinal resection      |                   | 0.33        | 0.04 – 2.74             | 0.31         |
| gastro-intestinal direct suture  |                   | 4.54        | 0.58 – 35.25            | 0.15         |
| <b>postoperative course</b>      |                   |             |                         |              |
| aortic complication              |                   | 1.85        | 0.54 – 6.36             | 0.33         |
| neurologic complication          |                   | 0.55        | 0.06 – 4.86             | 0.59         |
| surgical complication            |                   | 0.65        | 0.21 – 2.1              | 0.45         |
| medical complication             |                   | 2.4         | 0.62 – 9.5              | 0.21         |
| <b>outcome parameters</b>        |                   |             |                         |              |
| re-infection (persistent)        |                   | 0.56        | 0.2 – 1.59              | 0.28         |

**Table S6. Univariate analysis of re-infection (persistent).** Cox regression analysis; p<0.05 is considered significant and highlighted bold.

| re-infection (persistence)      |                   | Hazard ratio | 95%-confidence interval | p            |
|---------------------------------|-------------------|--------------|-------------------------|--------------|
| <b>patient characteristics</b>  |                   |              |                         |              |
| sex (male vs. female)           |                   | 1.36         | 0.63 – 2.98             | 0.62         |
| age (+1year)                    |                   | 1.03         | 1 – 1.06                | 0.06         |
| +1 co-morbidity                 |                   | 0.99         | 0.83 – 1.19             | 0.97         |
| diabetes                        |                   | 1.38         | 0.64 – 2.96             | 0.41         |
| nicotine abuse (active)         |                   | 0.97         | 0.46 – 2.1              | 0.94         |
| COPD                            |                   | 1.8          | 0.79 – 3.91             | 0.17         |
| renal insufficiency             |                   | 0.68         | 0.27 – 1.69             | 0.42         |
| dialysis                        |                   | 1.78         | 0.53 – 5.96             | 0.35         |
| cancer (history)                |                   | 1.2          | 0.51 – 2.9              | 0.67         |
| PAOD                            |                   | 1.08         | 0.53 – 2.26             | 0.82         |
| CAD                             |                   | 1.02         | 0.47 – 2.22             | 0.95         |
| <b>initial operation</b>        |                   |              |                         |              |
| aortic aneurysm                 |                   | 0.95         | 0.45 – 2.01             | 0.89         |
| occlusive disease               |                   | 1.04         | 0.48 – 2.24             | 0.92         |
| aortic dissection               |                   | 1.11         | 0.15 – 8.23             | 0.92         |
| EVAR                            |                   | 0.91         | 0.4 – 2.1               | 0.82         |
| TEVAR                           |                   | 0.71         | 0.17 – 2.97             | 0.63         |
| OAR                             |                   | 1.39         | 0.63 – 3.08             | 0.41         |
| rupture                         |                   | 0.98         | 0.34 – 2.84             | 0.97         |
| ex domo                         |                   | 1.55         | 0.71 – 3.35             | 0.27         |
| <b>VGEI characteristics</b>     |                   |              |                         |              |
| early infection                 |                   | 1.11         | 0.72 – 1.72             | 0.63         |
| late infection                  |                   | 2.01         | 0.56 – 7.28             | 0.28         |
| fistula                         |                   | 1.01         | 0.48 – 2.1              | 0.98         |
| B-symptoms                      |                   | 1.4          | 0.67 – 3.07             | 0.34         |
| <b>operative setting</b>        |                   |              |                         |              |
| emergency operation             |                   | <b>2.41</b>  | <b>1.07 – 5.46</b>      | <b>0.035</b> |
| extent                          | thoracic          | 1.29         | 0.47 – 3.56             | 0.62         |
|                                 | thorac-abdominal  | 0.71         | 0.63 – 7.79             | 0.77         |
|                                 | abdominal         | 1.12         | 0.15 – 8.3              | 0.91         |
| <b>procedural details</b>       |                   |              |                         |              |
| operating time (+30min)         |                   | 0.97         | 0.91 – 1.04             | 0.43         |
| reco                            | tube              | 0.85         | 0.32 – 2.24             | 0.74         |
|                                 | bifurcation       | 0.92         | 0.37 – 2.27             | 0.85         |
| material                        | pericardium       | 0.94         | 0.57 – 1.56             | 0.81         |
|                                 | silver coated Dac | 2.22         | 0.59 – 8.39             | 0.53         |
|                                 | deep vein         | 1.49         | 0.43 – 5.1              | 0.24         |
| renal cold perfusion            |                   | -            | -                       | -            |
| ECMO                            |                   | 1.25         | 0.47 – 3.28             | 0.66         |
| omentum plasty                  |                   | 1.56         | 0.47 – 5.2              | 0.47         |
| gastro-intestinal resection     |                   | 1.43         | 0.61 – 3.37             | 0.42         |
| gastro-intestinal direct suture |                   | 1.9          | 0.47 – 8.47             | 0.35         |
| pulmonary resection/suture      |                   | -            | -                       | -            |
| <b>postoperative course</b>     |                   |              |                         |              |
| aortic complication             |                   | 1.48         | 0.65 – 3.39             | 0.35         |
| neurologic complication         |                   | 0.54         | 0.12 – 2.23             | 0.4          |
| surgical complication           |                   | 1.78         | 0.78 – 4.06             | 0.17         |
| visceral complication           |                   | <b>4.5</b>   | <b>1.7 – 11.87</b>      | <b>0.002</b> |
| medical complication            |                   | 1.12         | 0.52 – 2.42             | 0.77         |
