# Supplementary figures and images for: Aortic Vascular Graft and Endograft Infection–Patient Outcome Cannot Be Determined Based on Pre-Operative Characteristics
Source: MDPI journal article supplement (doi:10.3390/jcm13010269), 2024-01-03

VGS 0 – no uptake

VGS 1

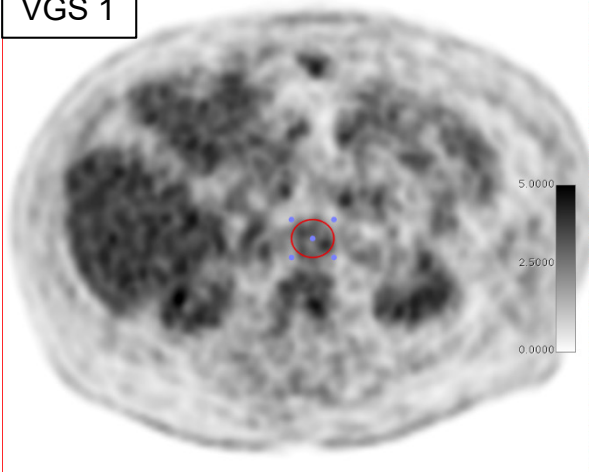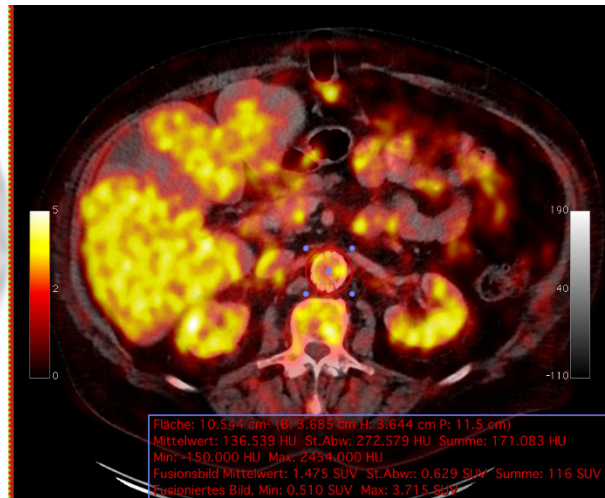

VGS 3

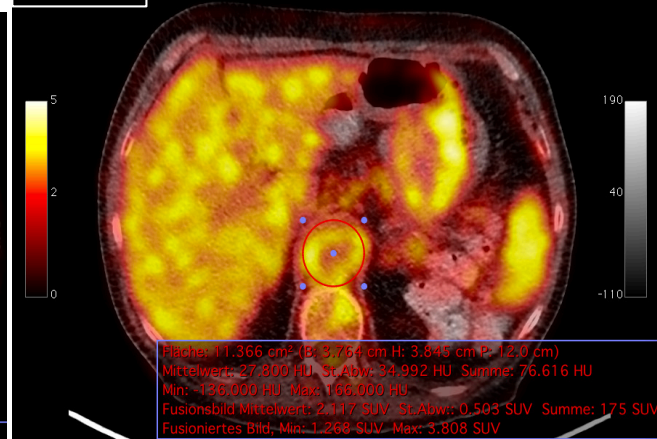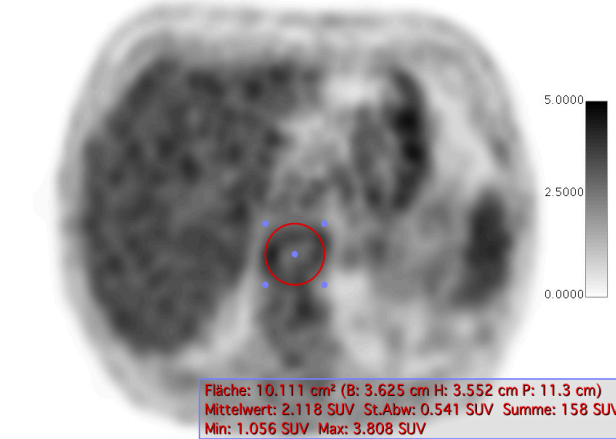

VGS 2

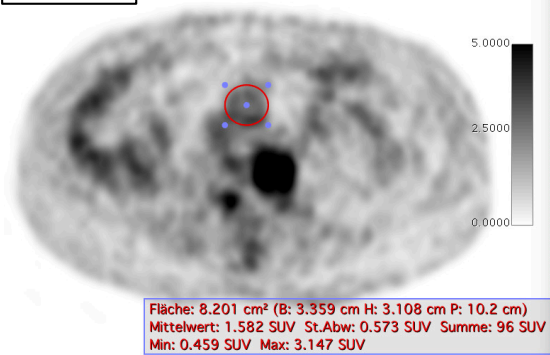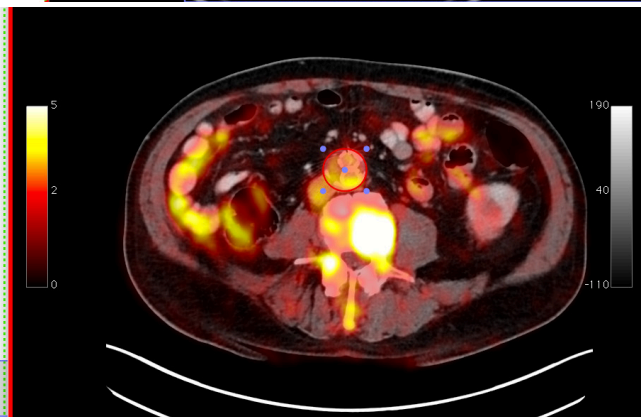

VGS 4

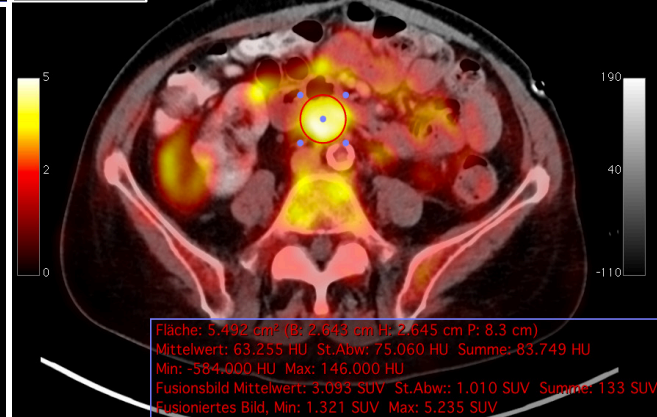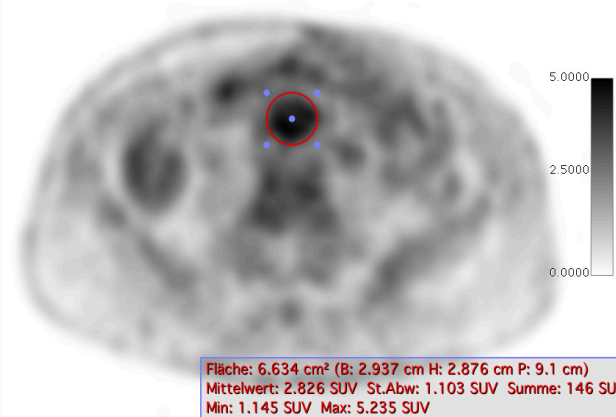

Supplement: s1 [file s1]

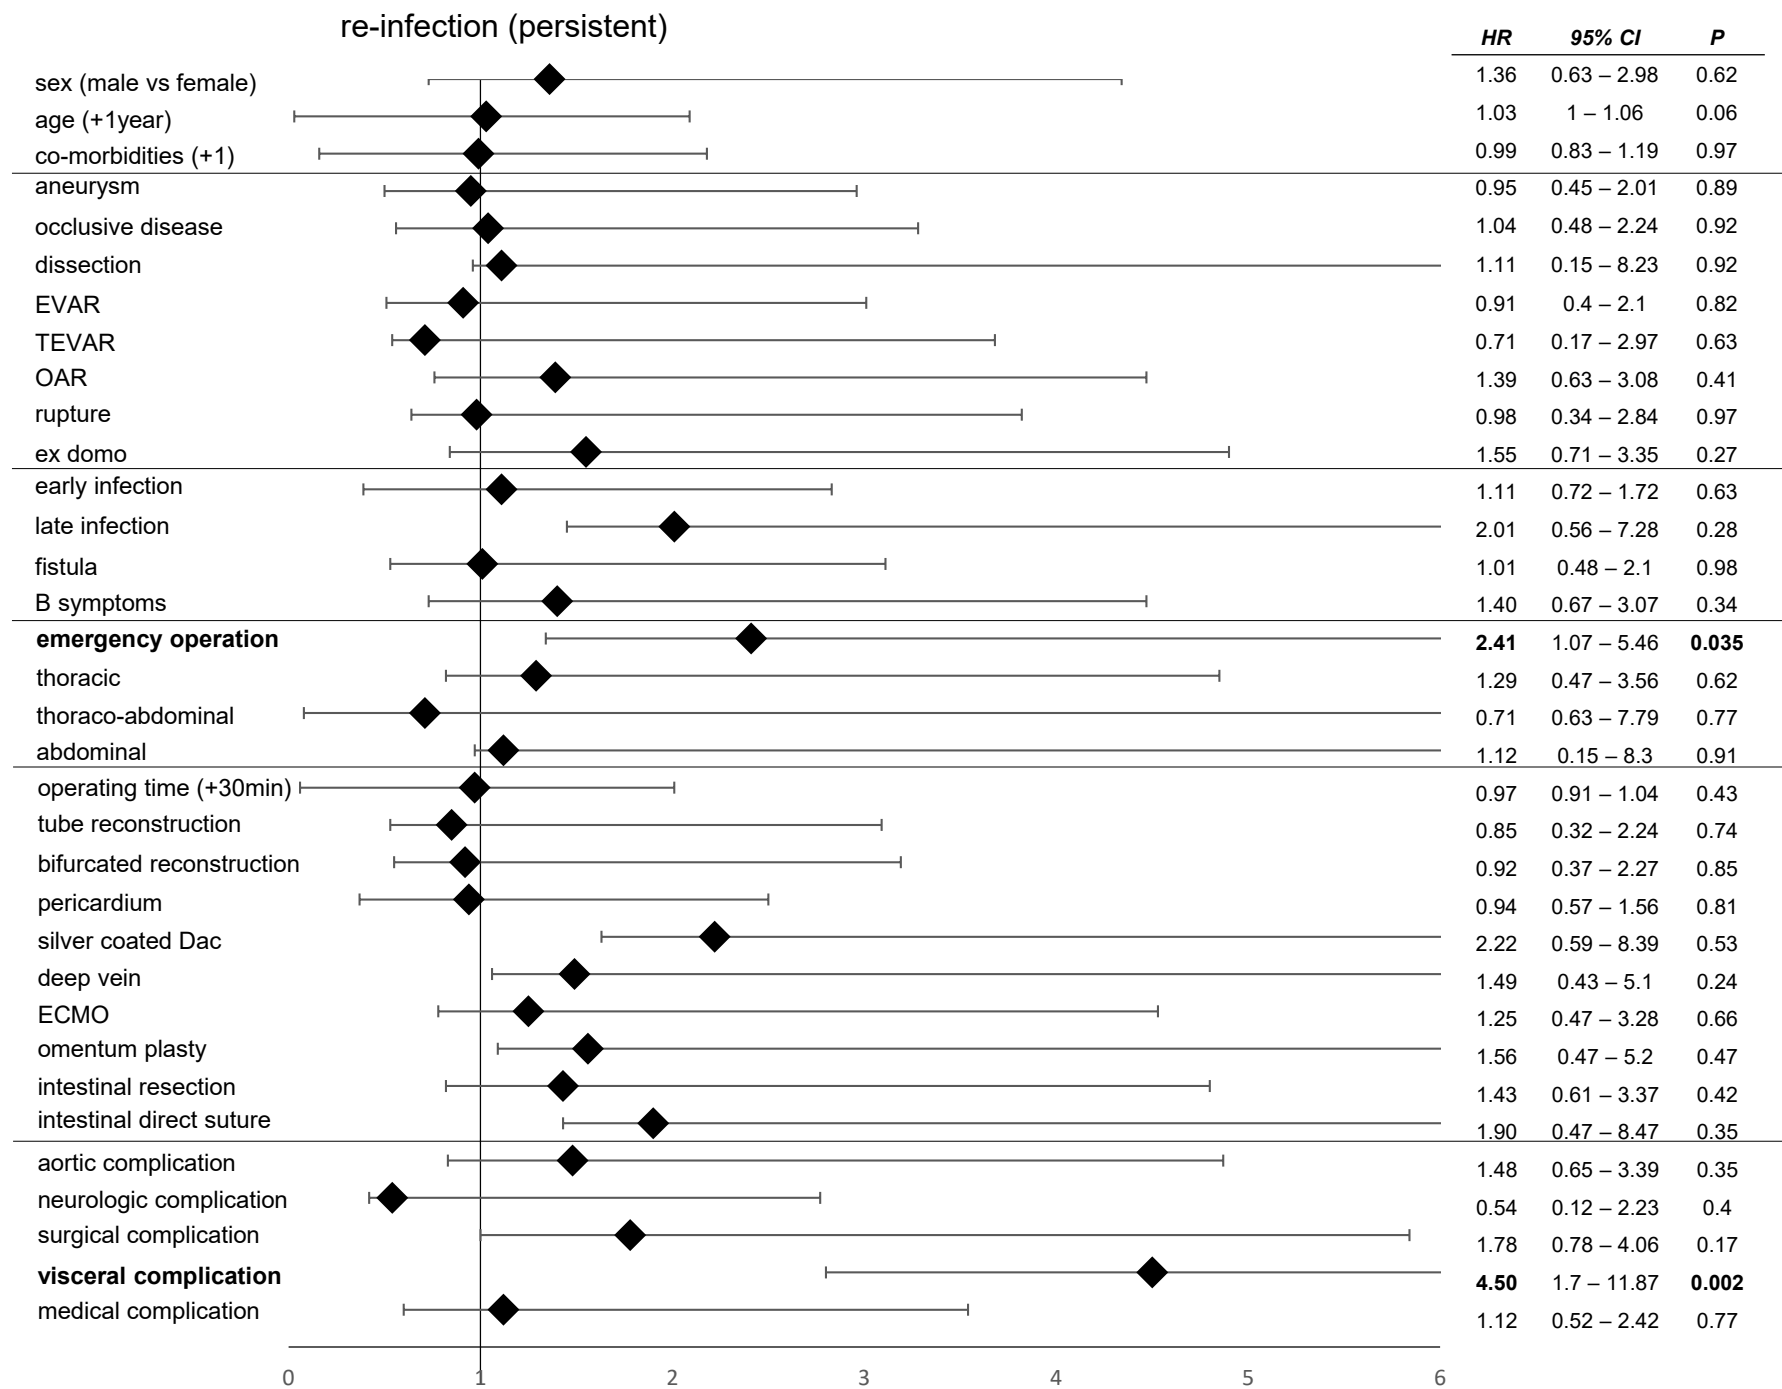

Supplement: s1 [file s1]
